# Supplementary material for: The ferroptosis activity is associated with neurological recovery following chronic compressive spinal cord injury
Source: PubMed Central journal article supplement — Neural Regen Res. 2023 Mar 15;18(11):2482–8. doi: 10.4103/1673-5374.371378 (PMC10360078; doi:10.4103/1673-5374.371378), 2023-03-15
Supplement: NRR-18-2482_Suppl1.pdf [file NRR-18-2482_Suppl1.pdf]

[illegible]

[illegible]























[illegible]

[illegible]

[illegible]









[illegible]













[illegible]

[illegible]

























































































































[illegible]











[illegible]

































































[illegible]



[illegible]



















[illegible]











|               |
|---------------|
| ENSG000001128 |
|---------------|











































|            |
|------------|
| ENSG000001 |
|------------|























































<

||
||
||
